**Table S1: Model selection using linear mixed-effect models and Akaike information criterion to test for the effects of state, wind speed, bird-wind angle (BWA), year and sex on  $ODBA_v$ .** Not all models are represented. Table S1A present the selection of models with a cumulative sum of AIC weights  $>0.9$  and the null model (intercept). Table S1B is the estimates of each best model with the lowest AIC. K is the number of parameters.  $\Delta AIC$  is the difference of AIC between a given model and the model with the lowest AIC. AIC weight is the probability that a given model is the best approximating model.

**S1A Model 1 selection (34 birds, 16696 locations)**

| N°         | Model                        | K        | AIC              | $\Delta AIC$ | AIC weight  |
|------------|------------------------------|----------|------------------|--------------|-------------|
| <b>1.1</b> | <b>State*WindSpeed*BWA</b>   | <b>9</b> | <b>-31597.64</b> | <b>0</b>     | <b>0.40</b> |
| 1.2        | Year+State*WindSpeed*BWA     | 10       | -31596.7         | 0.94         | 0.25        |
| 1.3        | Sex+State*WindSpeed*BWA      | 10       | -31595.98        | 1.66         | 0.17        |
| 1.4        | Year+Sex+State*WindSpeed*BWA | 11       | -31594.98        | 2.66         | 0.11        |
| 1.0        | Intercept                    | 2        | -31082.76        | 514.88       | 0.00        |

**S1B Model 1.1 parameter estimation**

|     | Parameter                     | Estimate  | SE       |
|-----|-------------------------------|-----------|----------|
| 1.1 | Intercept                     | 0.653     | 0.018    |
| 1.1 | StateTravelling               | -0.045    | 0.014    |
| 1.1 | WindSpeed                     | -0.0027   | 0.0020   |
| 1.1 | WindSpeed:StateTravelling     | 0.0022    | 0.0019   |
| 1.1 | BWA                           | -0.000011 | 0.000083 |
| 1.1 | BWA:StateTravelling           | -0.00016  | 0.00012  |
| 1.1 | WindSpeed:BWA                 | -0.000016 | 0.000011 |
| 1.1 | WindSpeed:BWA:StateTravelling | -0.000026 | 0.000017 |

1 **Table S2: Model selection using linear mixed-effect models and Akaike information criterion to**  
2 **test for the effects of trip phase, year and sex on ODBA<sub>v</sub> during travelling.** Not all models are  
3 represented. Table S2A present the selection of models with a cumulative sum of AIC weights >0.9  
4 and the null model (intercept). Table S2B is the estimates of each best model with the lowest AIC. K  
5 is the number of parameters.  $\Delta$ AIC is the difference of AIC between a given model and the model  
6 with the lowest AIC. AIC weight is the probability that a given model is the best approximating  
7 model.

**S2A Model 2 selection (32 birds, 11244 locations)**

| N°         | Model              | K        | AIC              | $\Delta$ AIC | AIC weight  |
|------------|--------------------|----------|------------------|--------------|-------------|
| <b>2.1</b> | <b>TripPhase</b>   | <b>3</b> | <b>-24502.54</b> | <b>0</b>     | <b>0.43</b> |
| 2.2        | Year+TripPhase     | 4        | -24501.47        | 1.07         | 0.25        |
| 2.3        | Sex+TripPhase      | 4        | -24501.06        | 1.48         | 0.21        |
| 2.4        | Year+Sex+TripPhase | 5        | -24499.85        | 2.69         | 0.11        |
| 2.0        | Intercept          | 2        | -24470.42        | 32.12        | 0.00        |

**S2B Model 2.1 parameter estimation**

|     | Parameter     | Estimate | SE    |
|-----|---------------|----------|-------|
| 2.1 | Intercept     | 0.591    | 0.012 |
| 2.1 | Middle Phase  | -0.023   | 0.006 |
| 2.1 | Outward Phase | -0.043   | 0.007 |

8

9
